## EXTRACELLULAR $\text{Ca}^{2+}$ AND ITS EFFECT ON ACID EXTRUSION IN THE CRAYFISH STRETCH RECEPTOR NEURONE

H. MOSER\*, N. MAIR AND F. FRESSER

Department of Zoology, Technikerstraße 25, A 6020 Innsbruck, Austria

Accepted 16 April 1996

### Summary

1. In the stretch receptor neurones of the crayfish *Astacus astacus*, the intracellular pH (pHi), the intracellular  $\text{Na}^+$  concentration ( $[\text{Na}^+]_i$ ) and the membrane potential ( $E_m$ ) were measured simultaneously using ion-selective and conventional microelectrodes. Normal *Astacus* saline (NAS), and salines containing varying amounts of  $\text{Ca}^{2+}$  ( $\text{Ca}^{2+}$ -NAS) but of constant ionic strength, with  $\text{Na}^+$ ,  $\text{Mg}^{2+}$  or  $\text{Ba}^{2+}$  as substituting ions, were used to investigate the effects of extracellular  $\text{Ca}^{2+}$  concentration ( $[\text{Ca}^{2+}]_o$ ) on pHi and pHi regulation, on  $[\text{Na}^+]_i$  and on  $E_m$ . The maximum rate of pHi recovery was used as a measure of pHi regulation. Acid loads were imposed using the  $\text{NH}_4^+/\text{NH}_3$  rebound technique.

2.  $[\text{Ca}^{2+}]_o$  affected pHi, pHi regulation,  $[\text{Na}^+]_i$  and  $E_m$ . The magnitudes of the effects were inversely related to  $[\text{Ca}^{2+}]_o$  and were specific to the ion used for  $[\text{Ca}^{2+}]_o$  substitution.

3. Compared with controls, increasing  $[\text{Ca}^{2+}]_o$  threefold (in exchange for  $\text{Na}^+$ ) elicited some alkalization, a 7 % faster maximum rate of pHi recovery and generally lower values of  $[\text{Na}^+]_i$ .

4. In low- $\text{Ca}^{2+}$  or  $\text{Ca}^{2+}$ -free NAS (substitutions by  $\text{Na}^+$  or  $\text{Mg}^{2+}$ ), pHi became more acid, the maximum rate of pHi recovery was reduced by up to 50 % and  $[\text{Na}^+]_i$  was generally higher. The effects were faster and larger at lower  $[\text{Ca}^{2+}]_o$ , and stronger with  $\text{Na}^+$  than with  $\text{Mg}^{2+}$  as the substituting ion.

5. In  $\text{Ca}^{2+}$ -free NAS ( $\text{Ca}^{2+}$  substituted for by  $\text{Ba}^{2+}$ ), the

effects on pHi, on the maximum rate of pHi recovery and on  $[\text{Na}^+]_i$  were generally small. In this respect,  $\text{Ba}^{2+}$  had similar physiological properties to  $\text{Ca}^{2+}$  and was almost equally effective.

6. Changes in  $E_m$ , including rapid depolarizations and occasional burst activity in  $\text{Ca}^{2+}$ -free NAS, indicate that alterations in the properties of the membrane, such as a change in its permeability or selectivity, are occurring. Measurements of  $[\text{Na}^+]_i$  support this view. In addition,  $\text{Ba}^{2+}$  *per se* induced a (small) depolarization, as shown when  $\text{Ba}^{2+}$  was present in NAS or in low- $\text{Ca}^{2+}$  NAS.

7. Changes in  $[\text{Ca}^{2+}]_o$  affected  $[\text{Na}^+]_i$ .  $*[\text{Na}^+]_i$  is defined as  $[\text{Na}^+]_i$  determined at the onset of the maximum rate of pHi recovery, and the ratio  $*[\text{Na}^+]_i/[\text{Na}^+]_o$  at that instant was calculated. A linear relationship between the maximum rate of pHi recovery and the  $*[\text{Na}^+]_i/[\text{Na}^+]_o$  ratio was found, irrespective of the amount and of the ion species used for  $[\text{Ca}^{2+}]_o$  substitution. This is strong evidence that pHi and pHi regulation were indirectly affected by  $[\text{Ca}^{2+}]_o$ , which altered membrane properties and thus caused a change in  $[\text{Na}^+]_i$ . We could find no evidence for a direct contribution of  $[\text{Ca}^{2+}]_o$  to acid extrusion or to a direct modulatory action on the transport protein of the  $\text{Na}^+/\text{H}^+$  antiporter.

Key words: intracellular pH, pHi regulation, intracellular  $\text{Na}^+$ ,  $\text{Ca}^{2+}$  substitutes,  $\text{Ba}^{2+}$ ,  $\text{Mg}^{2+}$ , EGTA, ion-selective microelectrode, sensory neurone, stretch receptor, crayfish, *Astacus astacus*.

### Introduction

Among a variety of other effects, extracellular  $\text{Ca}^{2+}$  concentration ( $[\text{Ca}^{2+}]_o$ ) is known to affect the properties of membrane proteins such as ion channels (e.g. Frankenhaeuser and Hodgkin, 1957; Armstrong and Cota, 1991; Schirmacher and Deitmer, 1991; Hille, 1992) and ion carriers (Vaughan-Jones *et al.* 1983). In this work, we are mainly concerned with the effects of  $[\text{Ca}^{2+}]_o$  on the ion carriers involved in the regulation of intracellular pH (pHi).

Both  $\text{Na}^+/\text{H}^+$  and  $\text{Na}^+/\text{H}^+/\text{HCO}_3^-/\text{Cl}^-$  antiporters contribute to acid extrusion in different crayfish cells (sensory neurones,

Moser, 1985; Mair *et al.* 1993; ganglion cells, Moody, 1981; muscle cells, Galler and Moser, 1986) as well as in many other cells (e.g. Roos and Boron, 1981; Moody, 1984; Thomas, 1984; Chesler, 1990). Mair *et al.* (1993) investigated the relationship between acid extrusion and  $[\text{Na}^+]_o$  in sensory neurones. They found that almost 80 % of pHi recovery was due to the activity of the  $\text{Na}^+/\text{H}^+$  antiporter, with the  $\text{Na}^+$  gradient serving as its main source of energy. The experiments described below were performed in order to examine whether, and in what way,  $[\text{Ca}^{2+}]_o$  affects the operation of the  $\text{Na}^+/\text{H}^+$

(and the  $\text{Na}^+/\text{H}^+/\text{HCO}_3^-/\text{Cl}^-$ ) antiporter. Every  $[\text{Ca}^{2+}]_o$ -induced effect on the  $\text{Na}^+/\text{H}^+$  antiporter should result in a change in the rate of pHi recovery, from which the maximum rate of recovery and related parameters (see Materials and methods) could be determined using conventional and  $\text{Na}^+$ - and  $\text{H}^+$ -selective microelectrodes to measure membrane potential ( $E_m$ ),  $[\text{Na}^+]_i$  and pHi.

### Materials and methods

Slowly adapting stretch receptor neurones from abdominal segments 2–5 of *Astacus astacus* L., bought from a hatchery in Augsburg (Germany), were dissected as described previously (Moser *et al.* 1979). Calibration of ion-selective microelectrodes (ISMs) and experiments were carried out in an experimental chamber connected to a flow-through system, which exchanged the bath volume of 0.7 ml within 5–6 s, at a temperature of 16 °C (Fresser *et al.* 1991). From 50 cells tested, the results from only 20 could be evaluated quantitatively, mainly because of difficulties with the electrodes.

### Chemicals and solutions

Chemicals of highest purity were obtained from Fluka (Buchs, Switzerland), Merck (Darmstadt, Germany) and Sigma (Deisenhofen, Germany). Normal *Astacus* saline (NAS), modified from that devised by van Harreveld (1936), consisted of (in  $\text{mmol l}^{-1}$ ): 207 NaCl, 5.4 KCl, 2.4  $\text{MgCl}_2$ , 13.5  $\text{CaCl}_2$ , 10 Hepes, adjusted to pH 7.4 with NaOH. The pH of all solutions was controlled using an Orion 8162 (Ross-type) glass electrode. For pH 6.4 salines, Pipes was used instead of Hepes.

$\text{CaCl}_2$  was substituted for either by equimolar amounts of the  $\text{Cl}^-$  salt of a divalent cation (e.g.  $\text{BaCl}_2$ ,  $\text{MgCl}_2$ ) or by a 1.5-fold higher concentration of NaCl in order to keep the ionic strength constant. 1  $\text{mmol l}^{-1}$  EGTA was added to some  $\text{Ca}^{2+}$ -free salines. In low- $\text{Na}^+$  salines, reductions in  $[\text{NaCl}]$  were compensated for by the addition of equimolar amounts of *N*-methyl-D-glucamine (NMDG), and HCl was used to adjust pH to 7.4. In  $\text{NH}_4^+$ -NAS, 20  $\text{mmol l}^{-1}$   $\text{NH}_4\text{Cl}$  was substituted for 20  $\text{mmol l}^{-1}$  NaCl. KCl was compensated for by equimolar substitution of NaCl.

All experiments were performed in nominally  $\text{HCO}_3^-/\text{CO}_2$ -free salines. Cells were acidified according to the  $\text{NH}_4^+/\text{NH}_3$  rebound technique (Boron and de Weer, 1976). The terminology used by these authors will be adopted here.

### Special terminology

The maximum pHi recovery rate is the fastest rate of pHi recovery after acid loading under various experimental conditions and usually occurs within 1 min after maximum pHi acidification. It was calculated from the steepest slope of pHi recovery (see Figs 1, 6). Maximum pHi recovery rates of test exposures were compared with those of controls (=100%).

$*[\text{Na}^+]_i$  and  $*[\text{H}^+]_i$

Concentrations marked with an asterisk (\*) were measured at the moment when the maximum pHi recovery rate was

achieved (see Fig. 1, arrows). The ratios  $*[\text{Na}^+]_i/[\text{Na}^+]_o$  and  $[\text{H}^+]_o/[\text{H}^+]_i$  refer to measurements at that instant. Ion concentrations without asterisks are steady-state values.

### Evaluation

The values given represent the means  $\pm$  the standard deviation (S.D.) from the mean from a certain number (*N*) of experiments. Student's unpaired *t*-tests were applied and significance was accepted at  $P < 0.05$ . Least-squares regression was used to fit lines to the data.

### Microelectrodes, electrical arrangement, recording and display

The tips of single-barrelled  $\text{Na}^+$  microelectrodes were filled with Fluka no. 71176 membrane cocktail and the  $\text{H}^+$  barrels of double-barrelled pH/ $E_m$  microelectrodes with Fluka no. 95293. Electrode fabrication, silanization and calibration are described in detail elsewhere (Mair *et al.* 1993). Pen recordings were digitized, using SummaSketch II hardware, and processed using Sigma-Scan V 3.90 software, converting mV to  $\text{mmol l}^{-1}$  or pH values. For data presentation, SigmaPlot 4.1 and 5.0 were used, giving rise to the small steps in Figs 1 and 6.

### Limitations of $\text{Na}^+$ used as a $\text{Ca}^{2+}$ substitute

Alterations to  $[\text{Ca}^{2+}]_o$  between 0 and 40.5  $\text{mmol l}^{-1}$  cause respective changes in  $[\text{Na}^+]_o$  between 171.5 and 232.25  $\text{mmol l}^{-1}$ . Taking into account an additional 20  $\text{mmol l}^{-1}$  reduction of  $[\text{Na}^+]_o$  from exposure to  $\text{NH}_4^+/\text{NH}_3$ , the lowest value of  $[\text{Na}^+]_o$  should thus be close to 150  $\text{mmol l}^{-1}$ .

Four cells were exposed for 10 min each to salines with  $[\text{Na}^+]_o$  reduced from 212  $\text{mmol l}^{-1}$  to as low as 50  $\text{mmol l}^{-1}$ , compensating for NaCl with NMDG. Despite this huge  $[\text{Na}^+]_o$  change,  $E_m$  hyperpolarized by only  $2.9 \pm 0.8$  mV,  $[\text{Na}^+]_i$  decreased by  $6.3 \pm 3.7$   $\text{mmol l}^{-1}$  and pHi acidified by  $0.078 \pm 0.03$  units, each parameter obtaining a quasi-stable value within about 3 min. As shown by previous results (Mair *et al.* 1993), the normalized maximum pHi recovery rate is still about 75 % in NAS containing only 50  $\text{mmol l}^{-1}$   $\text{Na}^+$ .

There is only a limited operational range over which  $[\text{Ca}^{2+}]_o$  can be increased, otherwise the concomitant changes in  $[\text{Na}^+]_o$  *per se* will affect pHi recovery. Increasing  $[\text{Ca}^{2+}]_o$  10-fold would reduce  $[\text{Na}^+]_o$  by 182  $\text{mmol l}^{-1}$ , and the resulting  $[\text{Na}^+]_o$  would be close to the  $K_m$  value at which the half-maximal pHi recovery rate occurs (see Mair *et al.* 1993). Thus, detailed experiments with  $[\text{Ca}^{2+}]_o$  increased by 10-fold were excluded.

On the basis of these results, we conclude that  $E_m$ , pHi and pHi regulation are minimally, if at all, affected by the much smaller  $[\text{Na}^+]_o$  changes imposed during the experiments reported below.

### Protocol

The sequence of exposures started with controls (NAS), followed by salines with high  $[\text{Ca}^{2+}]$  (e.g. 40.5  $\text{mmol l}^{-1}$ ) before testing, in decreasing order, salines with low  $[\text{Ca}^{2+}]$ . Each test was followed by a control exposure. Test exposures at various  $[\text{Ca}^{2+}]_o$  levels usually lasted for a total of 11 or

12 min, consisting of 3 min of pre-incubation, 3 min of  $\text{NH}_4^+/\text{NH}_3$  exposure and an additional 5 or 6 min in saline of the same  $[\text{Ca}^{2+}]_o$  in order to observe effects on pHi recovery, before washout in NAS.

## Results

### Reciprocal substitution of $\text{Ca}^{2+}$ and $\text{Na}^+$

The effects of varying  $[\text{Ca}^{2+}]_o$  on pHi,  $[\text{Na}^+]_i$  and  $E_m$  were investigated. The superimposed recordings in Fig. 1 are from a representative single cell in which control and test exposures followed alternately, but for clarity of presentation only one control recording is shown. The recordings indicate that pHi,  $[\text{Na}^+]_i$  and  $E_m$  recovered completely between the experiments.

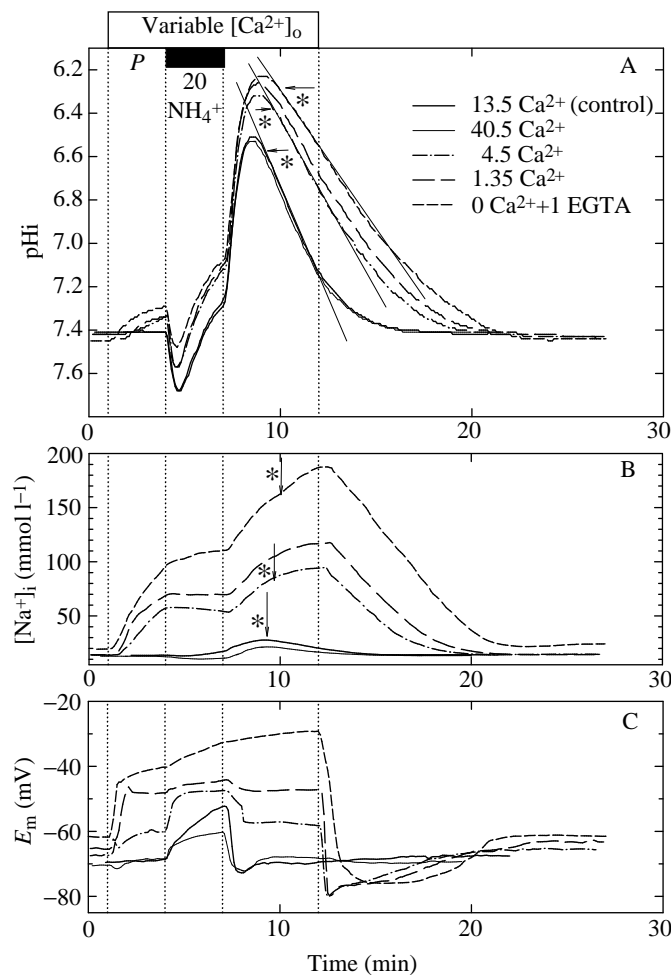

Fig. 1. Superimposed computer tracings from a single cell. Simultaneous measurements of intracellular pH (pHi, A), intracellular  $\text{Na}^+$  concentration ( $[\text{Na}^+]_i$ , B) and membrane potential ( $E_m$ , C) at various concentrations of extracellular  $\text{Ca}^{2+}$  ( $[\text{Ca}^{2+}]_o$ ).  $\text{Ca}^{2+}$  and  $\text{Na}^+$  were substituted reciprocally, keeping ionic strength constant. Tangents were drawn in order to calculate maximum pHi recovery rates, and the time at which maximum pHi recovery began is indicated by arrows. Measurements of  $[\text{H}^+]$  and  $[\text{Na}^+]$  referring to that instant are denoted by an asterisk (\* $[\text{Na}^+]_i$ , \* $[\text{H}^+]_i$ ) (also see Materials and methods). Concentrations are given in  $\text{mmol l}^{-1}$ . P, pre-incubation period.

Thus, after-effects from prior exposures are unlikely, although dramatic changes in the values of all the parameters of interest could occur during a single test, as will be shown below.

A 3 min exposure to  $\text{NH}_4^+/\text{NH}_3$  produces essentially the same features of a pHi response in controls and in salines containing different  $\text{Ca}^{2+}$  concentrations. We found that the pHi recovery curve had a constant portion (see Fig. 1), from which the maximum pHi recovery rate was calculated, and a subsequent declining portion. Usually, the decline started at a value (called the 'set point' by Grinstein *et al.* 1989) which was 0.3–0.4 pH units below steady-state pHi. The onset of maximum pHi recovery was determined. At that instant (arrows in Fig. 1A), the voltages from the  $\text{Na}^+$ - and  $\text{H}^+$ -selective microelectrodes were measured and the corresponding values of \* $[\text{Na}^+]_i$  and pHi or \* $[\text{H}^+]_i$  were calculated (assuming the same intra- and extracellular activity coefficients).

The main goal of this study was to investigate the effects of  $[\text{Ca}^{2+}]_o$  on pHi recovery. In Fig. 2, the maximum rate of pHi recovery is plotted *versus*  $[\text{Ca}^{2+}]_o$ . The results obtained during an increase as well as a decrease in  $[\text{Ca}^{2+}]_o$  will be described in more detail below.

### Increase of extracellular $[\text{Ca}^{2+}]$

A comparison of controls (=NAS) and cells exposed to  $\text{Ca}^{2+}$ -NAS containing three times the control  $[\text{Ca}^{2+}]$  (40.5  $\text{mmol l}^{-1}$   $\text{Ca}^{2+}$ ) showed that there was hardly any effect on the steady-state values of pHi,  $[\text{Na}^+]_i$  and  $E_m$  during the pre-incubation period (Fig. 1). In the presence of  $\text{NH}_4^+/\text{NH}_3$ , the induced depolarization was smaller in 40.5  $\text{mmol l}^{-1}$   $\text{Ca}^{2+}$  than in controls. The mean values of maximum acidification and the set point for the decline of pHi regulation were hardly affected when compared with controls.  $[\text{Na}^+]_i$  decreased (Fig. 1B) and the maximum pHi recovery rate was significantly faster ( $107 \pm 6\%$ ;

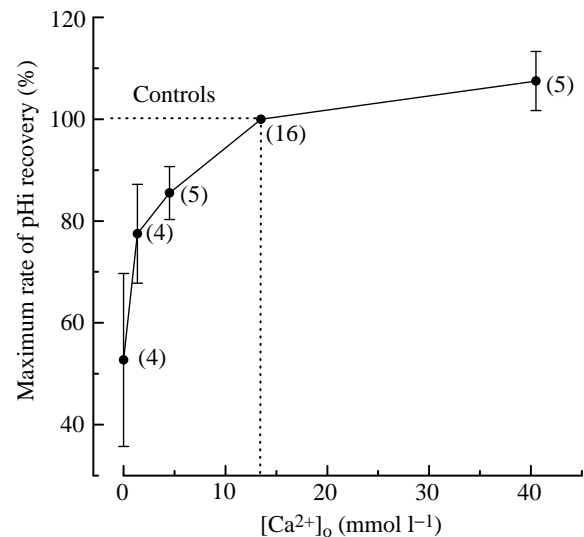

Fig. 2. Plot of normalized maximum pHi recovery rates *versus* extracellular  $\text{Ca}^{2+}$  concentration ( $[\text{Ca}^{2+}]_o$ ) from different numbers ( $N$ , given in parentheses) of cells.  $\text{Ca}^{2+}$  and  $\text{Na}^+$  were substituted reciprocally, keeping ionic strength constant. Values are means  $\pm$  S.D. The mean values are significantly different from each other ( $P < 0.05$ ).

$N=5$ ) in  $40.5 \text{ mmol l}^{-1} [\text{Ca}^{2+}]_o$  (Fig. 2). At the onset of maximum pH<sub>i</sub> recovery,  $*[\text{Na}^+]_i$  decreased from  $32.6 \pm 15 \text{ mmol l}^{-1}$  (controls) to  $22.2 \pm 3.9 \text{ mmol l}^{-1}$  in  $40.5 \text{ mmol l}^{-1} [\text{Ca}^{2+}]_o$ . These  $*[\text{Na}^+]_i$  control values agree well with those reported previously ( $31.1 \pm 11 \text{ mmol l}^{-1}$ ; Mair *et al.* 1993).

In a pilot study, we substituted all  $[\text{Na}^+]_o$  iso-osmotically with  $[\text{Ca}^{2+}]_o$  (the saline contained 0.67 times the control  $[\text{Ca}^{2+}]_o$ ; not shown) and observed a complete inhibition of pH<sub>i</sub> recovery. If any  $\text{Ca}^{2+}/2\text{H}^+$  exchange were present, some pH<sub>i</sub> regulation should have been detectable; however, this was not the case.

#### Decrease of extracellular $[\text{Ca}^{2+}]$

$[\text{Ca}^{2+}]_o$  was reduced from its normal concentration of  $13.5 \text{ mmol l}^{-1}$  in NAS to low- $\text{Ca}^{2+}$  NAS containing  $4.5 \text{ mmol l}^{-1}$  (=one-third normal  $[\text{Ca}^{2+}]_o$ ) or  $1.35 \text{ mmol l}^{-1}$  (=one-tenth normal  $[\text{Ca}^{2+}]_o$ ) and to nominally  $\text{Ca}^{2+}$ -free NAS (Fig. 1). The small differences in the steady-state values of pH<sub>i</sub>,  $[\text{Na}^+]_i$  and  $E_m$  at the beginning of each experiment, and the remarkable consistency in control values measured between test exposures (not shown), indicate that after-effects from prior exposures are negligible.

A reduction in  $[\text{Ca}^{2+}]_o$  affected steady-state pH<sub>i</sub>,  $[\text{Na}^+]_i$  and  $E_m$ , with the strongest effects observed in  $\text{Ca}^{2+}$ -free NAS. Generally, we found a change to a more acidic pH<sub>i</sub>, a rapid increase in  $[\text{Na}^+]_i$  and a rapid depolarization of  $E_m$ ; these tendencies may also be seen during the 3 min of pre-incubation in Fig. 1. In this cell, the rate of  $[\text{Na}^+]_i$  increase was  $19 \text{ mmol l}^{-1} \text{ min}^{-1}$  in  $4.5 \text{ mmol l}^{-1} \text{ Ca}^{2+}$ -NAS and  $40 \text{ mmol l}^{-1} \text{ min}^{-1}$  in  $0\text{-Ca}^{2+}$ -EGTA-NAS. In another four cells, exposed to  $1.35 \text{ mmol l}^{-1} \text{ Ca}^{2+}$ -NAS for 10 min (without an acid load), we found that pH<sub>i</sub> acidified by  $0.133 \pm 0.075$  units,  $[\text{Na}^+]_i$  increased by  $36.4 \pm 28.6 \text{ mmol l}^{-1}$  and  $E_m$  depolarized by  $7.1 \pm 7.4 \text{ mV}$ . These effects were most marked immediately following the solution change.

As shown in Fig. 2, the mean values of maximum rate of pH<sub>i</sub> recovery decreased in  $4.5 \text{ mmol l}^{-1} \text{ Ca}^{2+}$  to  $85 \pm 5\%$  ( $N=5$ ), in  $1.35 \text{ mmol l}^{-1} \text{ Ca}^{2+}$  to  $77 \pm 9\%$  ( $N=4$ ) and in  $0\text{-Ca}^{2+}$  to  $53 \pm 17\%$  ( $N=4$ ), compared with controls ( $100\%$ ;  $N=16$ ). Thus, the maximum pH<sub>i</sub> recovery rate in  $\text{Ca}^{2+}$ -free saline was only about half that in controls. Upon return to NAS (with normal  $\text{Ca}^{2+}$ ), the maximum pH<sub>i</sub> recovery rate was not usually enhanced. This can be seen in all the recordings with  $\text{Ca}^{2+}$ -reduced or  $\text{Ca}^{2+}$ -free salines (Fig. 1), particularly in the latter, where the maximum pH<sub>i</sub> recovery rate hardly changed for an additional 3 min after  $\text{Ca}^{2+}$  had been restored. In this cell, the rate of pH<sub>i</sub> recovery began to decline at a 'set point' of approximately pH<sub>i</sub> 7.0, which remained unchanged by the prior low- $\text{Ca}^{2+}$  exposures.

Upon  $\text{Ca}^{2+}$ -free ( $\text{Na}^+$ ) exposure, a small acceleration of acid extrusion was observed in just one cell, which also showed a short, transient retardation of pH<sub>i</sub> recovery immediately after the solution was changed.

On average ( $N=4-5$ ),  $*[\text{Na}^+]_i$  increased several-fold, from  $33 \pm 15 \text{ mmol l}^{-1}$  (control) to  $68 \pm 24 \text{ mmol l}^{-1}$  in  $4.5 \text{ mmol l}^{-1} \text{ Ca}^{2+}$ , to  $92 \pm 36 \text{ mmol l}^{-1}$  in  $1.35 \text{ mmol l}^{-1} \text{ Ca}^{2+}$  and to  $161 \pm 23 \text{ mmol l}^{-1}$  in  $0\text{-Ca}^{2+}$  measured at the onset of maximum

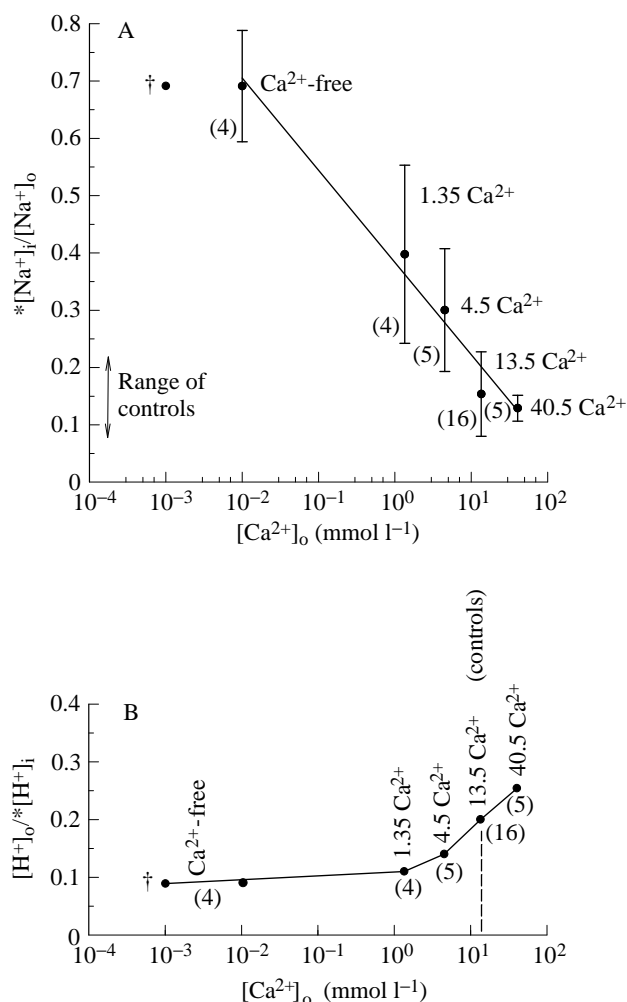

Fig. 3. Semilogarithmic plots of transmembrane ratios of  $\text{Na}^+$  (A) and  $\text{H}^+$  (B) *versus* extracellular  $\text{Ca}^{2+}$  concentration ( $[\text{Ca}^{2+}]_o$ ) from the number ( $N$ ) of cells given in parentheses.  $\text{Ca}^{2+}$  and  $\text{Na}^+$  were substituted reciprocally. Both  $[\text{Na}^+]_i$  and  $[\text{H}^+]_i$  were measured at the onset of maximum pH<sub>i</sub> recovery, as denoted by an asterisk ( $*[\text{Na}^+]_i$ ,  $*[\text{H}^+]_i$ ). The regression equation in A is  $y = -0.161x + 0.383$  (correlation coefficient 0.990). It seems unimportant whether a 1 or  $10 \mu\text{mol l}^{-1} \text{ Ca}^{2+}$  background (value marked †) was assumed in 'Ca<sup>2+</sup>-free' saline, as the calculated 95 % confidence interval (not shown) includes both values. Values are means  $\pm$  S.D.  $\text{Ca}^{2+}$  concentrations are given in  $\text{mmol l}^{-1}$ .

pH<sub>i</sub> recovery. Using these values,  $*[\text{Na}^+]_i / [\text{Na}^+]_o$  ratios of 0.154 (control), 0.30, 0.40 and 0.69 were calculated and plotted *versus*  $[\text{Ca}^{2+}]_o$  (Fig. 3A). The fourfold higher  $*[\text{Na}^+]_i / [\text{Na}^+]_o$  ratio elicited in  $\text{Ca}^{2+}$ -free ( $\text{Na}^+$ ) NAS was mainly due to an increase in  $[\text{Na}^+]_i$ . It appears to be unimportant whether a background level of 1 or  $10 \mu\text{mol l}^{-1} \text{ Ca}^{2+}$  was assumed in 'Ca<sup>2+</sup>-free' NAS, as the 95 % confidence interval of the regression included both values.

In a similar graph (Fig. 3B), the relationship between the ratio  $[\text{H}^+]_o / *[\text{H}^+]_i$  and  $[\text{Ca}^{2+}]_o$  is drawn. As  $[\text{H}^+]_o$  remained constant in all experiments, alterations of the  $[\text{H}^+]_o / *[\text{H}^+]_i$  ratio reflect changes in  $*[\text{H}^+]_i$ . Measured at the onset of maximum

pHi recovery,  $\text{Ca}^{2+}$ -free saline caused a twofold increase of  $*[\text{H}^+]_i$  when compared with controls. While  $[\text{Ca}^{2+}]_o$  reduction below  $1 \text{ mmol l}^{-1}$  hardly affected the  $[\text{H}^+]_o/[\text{H}^+]_i$  ratio, this range was very important for the  $*[\text{Na}^+]_i/[\text{Na}^+]_o$  ratio. This is shown in Fig. 4, where the maximum rate of pHi recovery is plotted *versus* the  $*[\text{Na}^+]_i/[\text{Na}^+]_o$  ratio.

#### $\text{Ca}^{2+}$ -free NAS: substitutions with $\text{Na}^+$ , $\text{Mg}^{2+}$ or $\text{Ba}^{2+}$

In  $\text{Ca}^{2+}$ -free NAS, with  $\text{Na}^+$  as the substituting ion, tests were performed in the absence as well as in the presence of EGTA, which buffers  $[\text{Ca}^{2+}]_o$  to about  $10^{-8} \text{ mol l}^{-1}$ . The results were basically similar, except that in the presence of EGTA any kind of recovery was much slower and rather incomplete, as shown in Fig. 5. These recordings were made with a pen recorder, to give a better impression of additional biological actions such as action potentials and late membrane changes.

Fig. 5 shows tracings of pen recordings and Fig. 6 of computer recordings of the superimposed responses from two different cells exposed to  $\text{Ca}^{2+}$ -free salines in which different substituting ions were used. Tests were separated by control exposures (not shown). Again, the high degree of recovery of pHi,  $[\text{Na}^+]_i$  and  $E_m$  indicates that after-effects from previous exposures are negligible.

During pre-incubation,  $\text{Ca}^{2+}$ -free NAS usually elicited some depolarization. This was strongest (100%) with  $\text{Na}^+$  as the substituting ion, while values of  $77 \pm 11\%$  ( $N=7$ ) were obtained with  $\text{Mg}^{2+}$  and  $48 \pm 13\%$  ( $N=12$ ) with  $\text{Ba}^{2+}$ . In addition,  $\text{Ca}^{2+}$ -free saline elicited an increase in  $[\text{Na}^+]_i$ , which was greatest (100%) with  $\text{Na}^+$  as the substituting ion, whereas with  $\text{Mg}^{2+}$  the  $[\text{Na}^+]_i$  increase was reduced to  $53 \pm 15\%$  ( $N=7$ ) and with

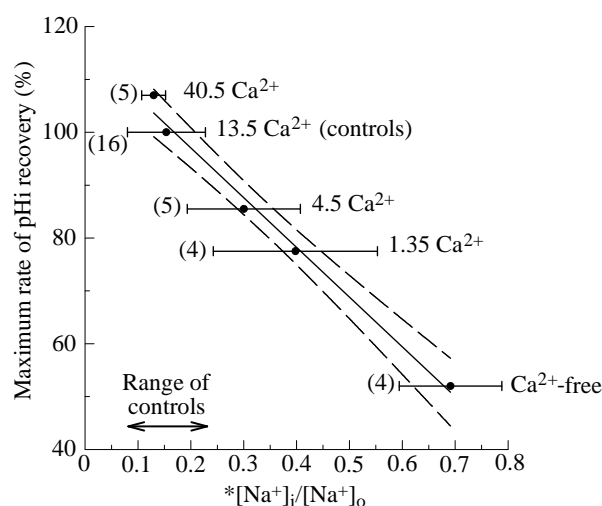

Fig. 4. Plot of normalized maximum pHi recovery rates (%) *versus* transmembrane  $[\text{Na}^+]$  ratios with  $[\text{Na}^+]_i$  measured at the onset of maximum pHi recovery as denoted by an asterisk.  $\text{Ca}^{2+}$  and  $\text{Na}^+$  were substituted reciprocally. The regression equation is  $y = -92.88x + 115.87$  (correlation coefficient 0.995). The mean values are significantly different from each other. For the sake of clarity, standard deviations for the maximum rate of pHi recovery have been omitted but were as shown in Fig. 2. Values are means  $\pm$  S.D., values of  $N$  are given in parentheses.  $\text{Ca}^{2+}$  concentrations are given in  $\text{mmol l}^{-1}$ .

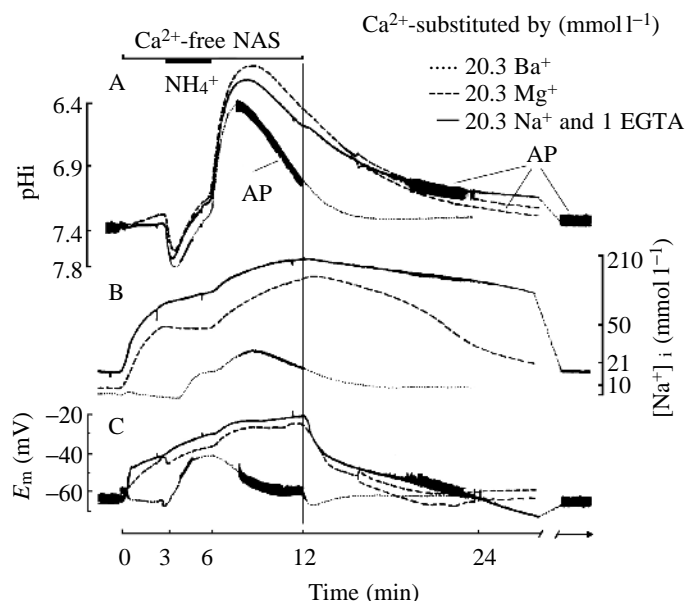

Fig. 5. Superimposed pen recordings (partially redrawn) from a single cell and simultaneous measurements of pHi (A), intracellular  $\text{Na}^+$  concentration ( $[\text{Na}^+]_i$ , B) and membrane potential ( $E_m$ , C) in  $\text{Ca}^{2+}$ -free salines. Extracellular  $\text{Ca}^{2+}$  was substituted by equimolar  $\text{Ba}^{2+}$  or  $\text{Mg}^{2+}$  or by 1.5 times  $[\text{Na}^+]$  to which  $1 \text{ mmol l}^{-1}$  EGTA had been added. The pHi response in the presence of  $\text{Ba}^{2+}$  is similar to that seen in controls. The interruption shown at the end of the  $\text{Na}^+$ -EGTA recording lasted 25 min. AP, action potential; NAS, normal *Astacus* saline.

$\text{Ba}^{2+}$  the increase almost disappeared ( $3 \pm 6\%$ ;  $N=12$ ). Complete substitution of  $\text{Ca}^{2+}$  by  $\text{Na}^+$  or  $\text{Mg}^{2+}$  resulted in intracellular acidification. Both acidification and the increase in  $[\text{Na}^+]_i$  were faster and stronger with  $\text{Na}^+$  than with  $\text{Mg}^{2+}$ .

Comparing  $\text{NH}_4^+/\text{NH}_3$  exposures with controls, the level of maximum acidification was larger, but the maximum rate of pHi recovery slower when  $\text{Na}^+$  or  $\text{Mg}^{2+}$  replaced  $[\text{Ca}^{2+}]_o$ . In three tests each, the maximum rate of pHi recovery was reduced to  $55 \pm 15\%$  ( $\text{Na}^+$ ) and  $68 \pm 4\%$  ( $\text{Mg}^{2+}$ ) and at the onset of maximum pHi recovery  $*[\text{Na}^+]_i$  increased to  $161 \pm 23 \text{ mmol l}^{-1}$  ( $\text{Na}^+$ ) and  $111 \pm 44 \text{ mmol l}^{-1}$  ( $\text{Mg}^{2+}$ ), and  $[\text{Na}^+]_i$  remained high or even increased until the solution was changed to NAS. At the onset of maximum pHi recovery, pHi was 6.36 ( $\text{Na}^+$ ) and 6.39 ( $\text{Mg}^{2+}$ ), resulting in a value for  $*[\text{H}^+]_i$  of  $4.36 \times 10^{-7} \text{ mol l}^{-1}$  in  $\text{Na}^+$ -substituted saline and  $4.07 \times 10^{-7} \text{ mol l}^{-1}$  in  $\text{Mg}^{2+}$ -substituted saline.

The results obtained with  $\text{Ca}^{2+}$ -free NAS in which  $\text{Na}^+$  or  $\text{Mg}^{2+}$  was substituted for  $[\text{Ca}^{2+}]_o$  clearly contrast with those obtained when  $\text{Ba}^{2+}$  was the substituting ion. During pre-incubation,  $\text{Ba}^{2+}$  caused a small  $[\text{Na}^+]_i$  decrease and during  $\text{NH}_4^+/\text{NH}_3$  exposure, the  $[\text{Na}^+]_i$  response was much like that of a control cell, but at a lower absolute  $[\text{Na}^+]_i$  level. Upon return from  $\text{Ca}^{2+}$ -free ( $\text{Ba}^{2+}$ ) NAS to NAS,  $[\text{Na}^+]_i$  gradually returned to the value attained before  $[\text{Ca}^{2+}]_o$  was substituted.

In  $\text{Ca}^{2+}$ -free ( $\text{Ba}^{2+}$ ) NAS, pHi hardly changed during pre-incubation and on exposure to  $\text{NH}_4^+/\text{NH}_3$  the pHi responses closely resembled those of controls. Small differences in the

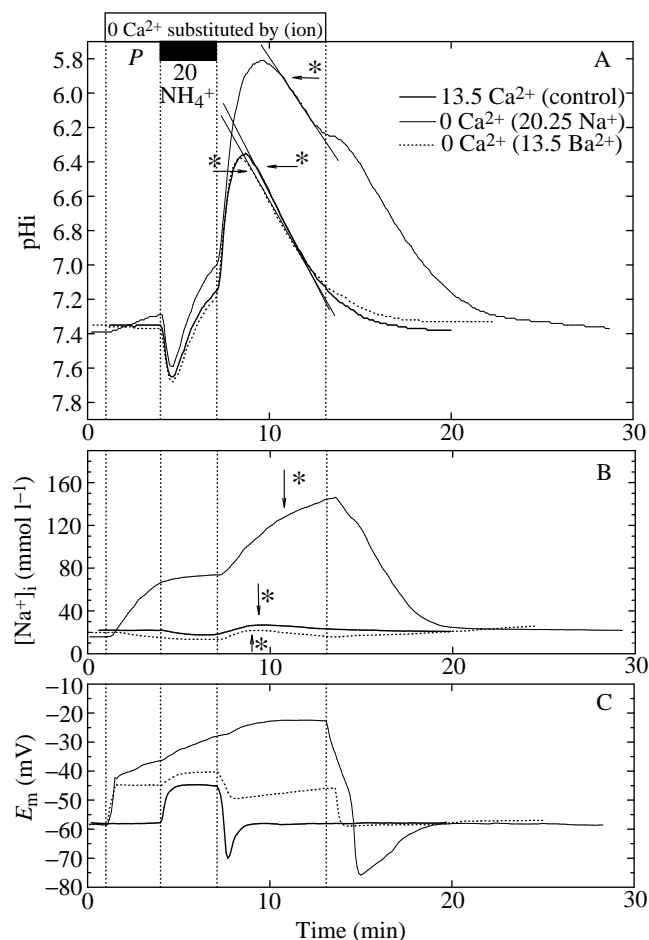

Fig. 6. Superimposed computer recordings from a single cell in  $\text{Ca}^{2+}$ -free salines. Simultaneous measurements of  $\text{pH}_i$  (A), intracellular  $\text{Na}^+$  concentration ( $[\text{Na}^+]_i$ , B) and membrane potential ( $E_m$ , C) are shown.  $[\text{Ca}^{2+}]_o$  was substituted by equimolar  $\text{Ba}^{2+}$  or by 1.5 times  $[\text{Na}^+]_i$  in order to keep ionic strength constant. See Fig. 1 for further details. Concentrations are given in  $\text{mmol l}^{-1}$ . P, pre-incubation period.

maximum amount of acidification as well as in the maximum rate of  $\text{pH}_i$  recovery seem to be within experimental variability. If  $[\text{Ca}^{2+}]_o$  had any direct or indirect functional role during  $\text{pH}_i$  recovery, it was almost perfectly fulfilled by  $\text{Ba}^{2+}$  too.

The variable and specific actions of substituting ions in low- $\text{Ca}^{2+}$  and in  $\text{Ca}^{2+}$ -free NAS on the maximum rate of  $\text{pH}_i$  recovery are closely related to the ratio  $*[\text{Na}^+]_i/[\text{Na}^+]_o$ , as shown in Fig. 7. For better comparison, the results from Fig. 4 have been redrawn as open symbols in Fig. 7.

### Discussion

#### Effects of $[\text{Ca}^{2+}]_o$ on $\text{pH}_i$ , $\text{pH}_i$ recovery, $[\text{Na}^+]_i$ and $E_m$

During their lifetime, crustaceans are repeatedly subjected to moulting cycles, accompanied by periodic changes in ion concentrations within their body (e.g. Cameron and Wood, 1985; Roer and Dillaman, 1984; Greenaway, 1985; Wheatly and Ignaszewski, 1990). While levels of ionized  $\text{Ca}^{2+}$  seem to

be fairly well controlled (Greenaway, 1974, 1985; Zanotto and Wheatly, 1993), levels of bound  $\text{Ca}^{2+}$  show clear changes. However, mechanisms to control  $\text{pH}_i$  are present, with both  $\text{Na}^+/\text{H}^+$  and  $\text{Na}^+/\text{H}^+/\text{HCO}_3^-/\text{Cl}^-$  antiporters available for acid extrusion in crayfish stretch receptor neurones (Mair *et al.* 1993; Moser, 1985). The main goal of this study was to investigate whether  $[\text{Ca}^{2+}]_o$  affected  $\text{pH}_i$  and  $\text{pH}_i$  regulation and, if so, to explain the mechanism.

To a certain extent it seems that  $[\text{Ca}^{2+}]_o$  affects both  $\text{pH}_i$  and the maximum rate of  $\text{pH}_i$  recovery (Fig. 1) in a way that is similar to  $[\text{Na}^+]_o$ , as demonstrated when the latter was substituted for by NMDG (Mair *et al.* 1993). Both low  $[\text{Ca}^{2+}]_o$  and low  $[\text{Na}^+]_o$  elicit some acidification which saturates with time, and both these salines partially inhibit  $\text{pH}_i$  regulation upon exposure to  $\text{NH}_4^+/\text{NH}_3$ . Although in  $\text{Ca}^{2+}$ -free NAS (Fig. 2), even in the presence of EGTA,  $\text{pH}_i$  recovery is reduced by only 50%, it is completely stopped in  $\text{Na}^+$ -free saline. After exposure to low  $[\text{Na}^+]_o$ , washout in NAS always resulted in an instantaneous acceleration of  $\text{pH}_i$  recovery; this was usually not observed after exposure to low  $[\text{Ca}^{2+}]_o$ . Taken together, these results indicate that, at least for  $\text{pH}_i$  recovery, the action and functional roles of  $\text{Na}^+$  and  $\text{Ca}^{2+}$  are quite different. While  $\text{Na}^+$  is directly involved in the operation of the  $\text{Na}^+/\text{H}^+$  antiporter as an essential substrate,  $\text{Ca}^{2+}$  acts indirectly, exerting its effect *via* the transmembrane  $\text{Na}^+$  gradient (see below).

Simultaneous measurements of  $[\text{Na}^+]_o$  and  $\text{pH}_i$  enabled us

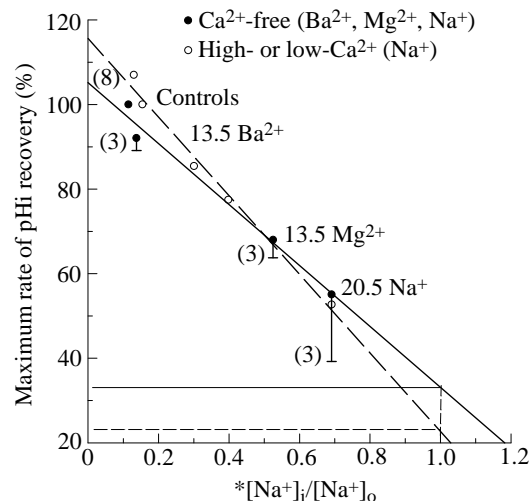

Fig. 7. Plot of normalized maximum  $\text{pH}_i$  recovery rates (%) versus the transmembrane ratios of  $\text{Na}^+$ , with  $[\text{Na}^+]_i$  measured at the onset of maximum  $\text{pH}_i$  recovery rate, as denoted by an asterisk. Filled circles represent data from cells exposed to  $\text{Ca}^{2+}$ -free NAS with different substituting ions, while open circles represent data from Fig. 4, for comparison. The regression equation is  $y = -72.0x + 105.2$  (correlation coefficient 0.992). Using both regressions and extrapolating each for  $[\text{Na}^+]_i = [\text{Na}^+]_o$ , as indicated by a solid and a dashed line, the normalized maximum rates of  $\text{pH}_i$  recovery cover a range of about 30%. Values are means  $\pm$  S.D., values of  $N$  are given in parentheses. Concentrations of  $\text{Ba}^{2+}$ ,  $\text{Mg}^{2+}$  and  $\text{Na}^+$  are given in  $\text{mmol l}^{-1}$ .

to calculate the ratios  $^*[Na^+]_i/[Na^+]_o$  and  $[H^+]_o/^*[H^+]_i$  at the onset of maximum pHi recovery. On a semilogarithmic scale, the relationship between mean  $^*[Na^+]_i/[Na^+]_o$  and  $[Ca^{2+}]_o$  was linear, while that between mean  $[H^+]_o/^*[H^+]_i$  and  $[Ca^{2+}]_o$  was nonlinear, as shown in Fig. 3A,B. Since in the sensory cell, the transmembrane  $Na^+$  gradient must be considered to be the main energy source for pHi regulation (Mair *et al.* 1993), the maximum rate of pHi recovery was plotted *versus* the  $^*[Na^+]_i/[Na^+]_o$  ratio (Fig. 4). Irrespective of  $[Ca^{2+}]_o$ , all mean values are within the 95% confidence interval of that regression, suggesting a strong correlation between the maximum rate of pHi recovery and the transmembrane  $[Na^+]$  gradient. In view of the considerable range of standard deviations for the controls, which has been noticed before (Mair *et al.* 1993), the range of standard deviations in experimental treatments is not surprising.

Fig. 4 also shows a 50% reduction in maximum pHi recovery rate at a  $^*[Na^+]_i/[Na^+]_o$  of about 0.7; this was due to an increase in  $^*[Na^+]_i$ . Compared with previous results (Mair *et al.* 1993; Fig. 7), the same degree of inhibition of the rate of pHi recovery was observed when  $[Na^+]_o$  was reduced to  $21\text{ mmol l}^{-1}$  ( $K_m$  value). Taking into account the  $[Na^+]_i$  decrease that could be elicited in these tests by low- $Na^+$  saline, it seems probable that a  $^*[Na^+]_i/[Na^+]_o$  ratio of approximately 0.7 existed. This indicates that, under both experimental conditions, the  $Na^+/H^+$  antiporter was fuelled by the  $Na^+$  gradient.

Relatively rapid depolarizations of  $E_m$  as well as burst-like activity were observed when the saline was changed to low- $Ca^{2+}$  or  $Ca^{2+}$ -free NAS. In crayfish stretch receptor neurones, similar effects could be elicited by various stimuli (e.g. Wiersma *et al.* 1953; Moser *et al.* 1979; Barrio *et al.* 1991), all of which affected membrane permeability, concomitant with a decrease in membrane resistance. In parallel with depolarizations, we observed rapid increases in  $[Na^+]_i$ , indicative of an increase in membrane  $Na^+$  permeability (Figs 1, 5, 6).

To determine which type(s) of cation channels are responsible for the increase in  $[Na^+]_i$  when  $[Ca^{2+}]_o$  is reduced is rather complex. While there is experimental evidence that tetrodotoxin-sensitive  $Na^+$  channels are not involved, the potential role of several types of  $K^+$  channels and stretch-activated channels, which are known to be present in this preparation (Rydqvist, 1992), remains unclear. Using  $Ba^{2+}$  to substitute for  $Ca^{2+}$ , we observed depolarizations that were probably due to a block of  $K^+$  conductances, but these were accompanied by only small, usually decreasing, changes in  $[Na^+]_i$ . This contrasts with the results obtained when  $Na^+$  or  $Mg^{2+}$  was substituted for  $Ca^{2+}$ . This observation, as well as the results from the tetrodotoxin experiments, indicates that voltage-activated cation channels play a minor role in the increase in  $[Na^+]_i$ . Whether modulation of  $[Ca^{2+}]_o$  affects stretch-activated channels directly or indirectly by causing tension changes in the receptor muscle, as is known from other systems (Austin and Wray, 1995), remains open for discussion.

The maximum rate of pHi recovery does not seem to be

affected by the rapid 50 mV potential change in  $E_m$  (Fig. 1) that accompanies the washout of  $Ca^{2+}$ -free NAS, which is in agreement with previous results (Mair *et al.* 1993). Nevertheless, these experiments are further evidence that pHi regulation (especially the  $Na^+/H^+$  exchange) *per se* is not electrogenic in the crayfish stretch receptor neurone. In this respect, the crayfish sensory cell is quite different from leech glial cells, in which an electrogenic  $Na^+/HCO_3^-$  cotransporter dominates pHi regulation (Deitmer and Schneider, 1995).

The experiments reported here do not provide conclusive evidence for the effects of  $[Ca^{2+}]_o$  on intracellular  $H^+$  buffering for two reasons. (1)  $[Ca^{2+}]_o$  generally affects membrane permeability and changes the dynamics of both  $NH_3$  and  $NH_4^+$  influx to an unknown extent. A smaller initial alkalization does not necessarily reflect increased  $H^+$  buffering, but it could result from a faster influx of  $NH_4^+$ . (2) In low- $Ca^{2+}$  NAS or in  $Ca^{2+}$ -free NAS, the  $Na^+$  gradient changes very quickly. Even on initial exposure to  $NH_3/NH_4^+$ , this could result in a lower rate of acid extrusion. In turn, this could affect the degree of initial alkalization, mimicking a direct influence on  $H^+$  buffering. In the light of these arguments, we nevertheless tend to assume that in crayfish sensory neurones the effect of  $[Ca^{2+}]_o$  on intracellular  $H^+$  buffering is small.

In  $Ca^{2+}$ -free NAS, pHi and the maximum rate of pHi recovery seem to be closely related to the ion species used as a  $Ca^{2+}$  substitute (Figs 5–7). With  $Ba^{2+}$ , the maximum rate of pHi recovery is similar to that of controls, while the rate is reduced by about one-third with  $Mg^{2+}$  and by about half with  $Na^+$ . The relationship between the maximum rate of pHi recovery and the ratio  $^*[Na^+]_i/[Na^+]_o$  was found to be linear, with a slope similar to that obtained in low- $Ca^{2+}$  experiments. This observation is strong evidence that it was actually  $Ca^{2+}$ , and not a substituting ion, that caused the effects on pHi and pHi recovery, and that the substituting ions affect, to varying degrees, the same membrane mechanisms as  $Ca^{2+}$  does in NAS. Direct involvement of  $[Ca^{2+}]_o$  in the activity of the  $Na^+/H^+$  exchanger seems to be rather unlikely. To explain the action of  $[Ca^{2+}]_o$  on pHi and pHi regulation, the following model is proposed.

#### Model of $[Ca^{2+}]_o$ action on pHi regulation

Membrane permeability is controlled in  $[Ca^{2+}]_o$ . A reduction of  $[Ca^{2+}]_o$  causes an increase in permeability, favouring the transmembrane passage of  $Na^+$ , while an increase in  $[Ca^{2+}]_o$  decreases membrane permeability, impeding  $Na^+$  passage and resulting in a decrease of  $[Na^+]_i$ . The observed  $[Na^+]_i$  changes are probably due to the effects of  $Ca^{2+}$  on cation channels (see above), as will be discussed in detail in a separate article.

Any change in  $[Na^+]_i$  affects the  $[Na^+]_i/[Na^+]_o$  ratio, which represents the main driving force for pHi recovery. Low  $^*[Na^+]_i/[Na^+]_o$  ratios are consistent with fast pHi recovery rates during exposure to NAS or high- $Ca^{2+}$  NAS, while exposure to low- $Ca^{2+}$  NAS or  $Ca^{2+}$ -free NAS causes higher  $^*[Na^+]_i/[Na^+]_o$  ratios, which are consistent with slower rates of pHi recovery.

The effects on maximum pHi recovery rate of different ions substituting for  $Ca^{2+}$  seem to be mainly due to ion-specific

actions on membrane permeability. Consequently, the substituting ions do not act directly on the  $H^+$ -transporting proteins. With  $Na^+$  and  $Mg^{2+}$  as  $Ca^{2+}$  substitutes, membrane depolarizations and the increase in  $[Na^+]_i$  are larger, and pHi recovery lower, than with  $Ba^{2+}$ . Substitution with  $Ba^{2+}$  produces only small changes in  $E_m$ ,  $[Na^+]_i$  and the rate of pHi recovery compared with controls.

#### *Implications of the model*

If the  $Na^+$  gradient were the only factor supplying energy for pHi regulation, recovery should stop when the  $*[Na^+]_i/[Na^+]_o$  ratio is 1 (see Fig. 7). However, at this value we found a residual maximum pHi recovery rate that was still between 23 and 33 % of that of controls (100 %). This result can be explained in two different ways: (1) the remaining pHi recovery could reflect activity of the  $Na^+/H^+/HCO_3^-/Cl^-$  exchanger, which we know (Mair *et al.* 1993) to contribute about 20 % of the pHi regulation; (2) the residual pHi recovery could reflect the contribution of the  $H^+$  gradient to  $Na^+/H^+$  antiport, since it is known that both the  $Na^+$  gradient and the  $H^+$  gradient fuel  $Na^+/H^+$  antiport (Aronson, 1985; Grinstein and Rothstein, 1986; Kinsella and Aronson, 1980; Mair *et al.* 1993). Further investigations are necessary to decide between these possibilities, but the results are of little importance for this article.

At steady state, the  $[Na^+]_i/[Na^+]_o$  ratio is close to 0.1. Exposure to  $NH_4^+/NH_3$  increased the  $*[Na^+]_i/[Na^+]_o$  ratio ( $[Na^+]_i$  measured at the onset of maximum pHi recovery) to a value of about 0.15, thereby changing  $[Na^+]_i$  by almost 50 %, but decreasing the maximum rate of pHi recovery by about 7 %. When  $*[Na^+]_i$  increased twofold, the maximum rate of pHi recovery was about 15 % lower than in controls. When  $[Na^+]_i$  increased to half  $[Na^+]_o$ , the maximum rate of pHi recovery was reduced by about 30 %. From these examples, we conclude that the maximum rate of pHi recovery is relatively insensitive to changes in  $[Na^+]_i$ .

The addition of chelating substances to physiological salines could result in considerable changes in  $[Ca^{2+}]_o$ . Such an effect is known from experiments performed in  $Cl^-$ -free salines, in which  $Cl^-$  salts were substituted for by salts of gluconic acid. In NAS, an equimolar substitution of  $CaCl_2$  will result in a reduction of free  $[Ca^{2+}]_o$  to one-quarter of the original level. From the experiments reported above, it is evident that such a substitution will result in a considerable increase in  $[Na^+]_i$ , with implications for pHi and pHi recovery. To avoid all these effects,  $[Ca^{2+}]_o$  compensation seems inevitable.

#### *The question of a $Ca^{2+}/2H^+$ exchanger*

In crayfish stretch receptor neurones, any significant contribution of a  $Ca^{2+}/2H^+$  exchanger or an equivalent  $Ca^{2+}$  exchange mechanism to pHi recovery is unlikely for two reasons. (1) Substantial pHi regulation continued to be observed in  $Ca^{2+}$ -free NAS (Figs 1, 5), even in the presence of EGTA. A 50 % lower maximum pHi recovery rate can be fully explained by a concomitant change in the  $*[Na^+]_i/[Na^+]_o$  ratio induced by  $Ca^{2+}$ -free conditions. (2) Exposures to high- $Ca^{2+}$

NAS, substituting all  $[Na^+]_o$  by 0.67 times the  $[Ca^{2+}]_o$  of NAS (not shown), resulted in complete inhibition of pHi recovery. If any  $Ca^{2+}/2H^+$  antiport were present, some pHi regulation should have been detectable. This, however, was not the case.

Since the  $Na^+/H^+$  antiporter seems to be in more or less full operation even during ecdysis (Mair *et al.* 1993), this could have minimized the evolutionary demand of developing an additional  $Ca^{2+}/2H^+$  antiporter.

We wish to thank Mag. Gabriele Buemberger for linguistic improvements.

#### References

- ARMSTRONG, C. M. AND COTA, G. (1991). Calcium ion as a cofactor in Na channel gating. *Proc. natn. Acad. Sci. U.S.A.* **88**, 6528–6531.
- ARONSON, P. S. (1985). Kinetic properties of the plasma membrane  $Na^+-H^+$  exchanger. *A. Rev. Physiol.* **47**, 545–560.
- AUSTIN, C. AND WRAY, S. (1995). The effects of extracellular pH and calcium change on force and intracellular calcium in rat vascular smooth muscle. *J. Physiol., Lond.* **488**, 281–291.
- BARRIO, L. C., CLARAC, F. AND BUNO, W. (1991). TTX sensitive plateau potentials in the crayfish slowly adapting stretch receptor neuron. *J. comp. Physiol. A* **168**, 313–321.
- BORON, W. F. AND DE WEER, P. (1976). Intracellular pH transients in squid giant axons caused by  $CO_2$ ,  $NH_3$  and metabolic inhibitors. *J. gen. Physiol.* **67**, 91–112.
- CAMERON, J. N. AND WOOD, C. M. (1985). Apparent  $H^+$  excretion and  $CO_2$  dynamics accompanying carapace mineralization in the blue crab (*Callinectes sapidus*) following moulting. *J. exp. Biol.* **114**, 181–196.
- CHESLER, M. (1990). The regulation and modulation of pH in the nervous system. *Prog. Neurobiol.* **34**, 401–427.
- DEITMER, J. W. AND SCHNEIDER, H. P. (1995). Voltage dependent clamp of intracellular pH of identified leech glial cells. *J. Physiol., Lond.* **485**, 157–166.
- FRANKENHAEUSER, B. AND HODGKIN, A. L. (1957). The action of calcium on the electrical properties of squid axons. *J. Physiol., Lond.* **137**, 218–244.
- FRESSER, F., MOSER, H. AND MAIR, N. (1991). Intra- and extracellular use and evaluation of ammonium-selective microelectrodes. *J. exp. Biol.* **157**, 227–241.
- GALLER, S. AND MOSER, H. (1986). The ionic mechanism of intracellular pH regulation in crayfish muscle fibres. *J. Physiol., Lond.* **374**, 137–151.
- GREENAWAY, P. (1974). Total body calcium and haemolymph calcium concentration in the freshwater crayfish *Austropotamobius pallipes* (Lereboullet). *J. exp. Biol.* **61**, 19–26.
- GREENAWAY, P. (1985). Calcium balance and moulting in Crustacea. *Biol. Rev.* **60**, 425–454.
- GRINSTEIN, S. AND ROTHSTEIN, A. (1986). Mechanisms of regulation of the  $Na^+/H^+$  exchanger. *J. Membr. Biol.* **90**, 1–12.
- GRINSTEIN, S., ROTIN, D. AND MASON, M. J. (1989).  $Na^+/H^+$  exchange and growth factor-induced cytosolic pH changes. Role in cellular proliferation. *Biochim. biophys. Acta* **988**, 73–97.
- HILLE, B. (1992). *Ionic Channels of Excitable Membranes*. Sunderland, MA: Sinauer Associates Inc. Publishers.
- KINSELLA, J. L. AND ARONSON, P. S. (1980). Properties of the  $Na^+/H^+$  exchanger in renal microvillus membrane vesicles. *Am. J. Physiol.* **238**, F461–F469.



- MAIR, N., MOSER, H. AND FRESSER, F. (1993). Contribution of the  $\text{Na}^+/\text{H}^+$  antiporter to the regulation of intracellular pH in crayfish stretch receptor neurone. *J. exp. Biol.* **178**, 109–124.
- MOODY, W. J. (1981). The ionic mechanism of intracellular pH regulation in crayfish neurones. *J. Physiol., Lond.* **316**, 293–308.
- MOODY, W. J. (1984). Effects of intracellular  $\text{H}^+$  on the electrical properties of excitable cells. *A. Rev. Neurosci.* **7**, 257–278.
- MOSER, H. (1985). Intracellular pH regulation in the sensory neurone of the stretch receptor of the crayfish (*Astacus fluviatilis*). *J. Physiol., Lond.* **362**, 23–38.
- MOSER, H., OTTOSON, D. AND RYDQVIST, B. (1979). Step-like shifts of membrane potential in the stretch receptor neurone of the crayfish (*Astacus fluviatilis*) at high temperatures. *J. comp. Physiol.* **133A**, 257–265.
- ROER, R. D. AND DILLAMAN, R. (1984). The structure and calcification of the crustacean cuticle. *Am. Zool.* **24**, 893–909.
- ROOS, A. AND BORON, W. F. (1981). Intracellular pH. *Physiol. Rev.* **61**, 296–434.
- RYDQVIST, B. (1992). Muscle receptors in invertebrates. In *Advances in Comparative and Environmental Physiology*, vol. 10 (ed. F. Ito), pp. 233–269. Berlin, Heidelberg, New York: Springer Verlag.
- SCHIRRMACHER, K. AND DEITMER, J. W. (1991). Sodium- and calcium-dependent excitability of embryonic leech ganglion cells in culture. *J. exp. Biol.* **155**, 435–453.
- THOMAS, R. C. (1984). Experimental displacement of intracellular pH and the mechanism of its subsequent recovery. *J. Physiol., Lond.* **354**, 3P–22P.
- VAN HARREVELD, A. (1936). A physiological solution for fresh-water crustaceans. *Proc. Soc. exp. Biol. Med.* **34**, 428–432.
- VAUGHAN-JONES, R. D., LEDERER, W. J. AND EISNER, D. A. (1983).  $\text{Ca}^{2+}$  ions can affect intracellular pH in mammalian cardiac muscle. *Nature* **301**, 522–524.
- WHEATLY, M. G. AND IGNASZEWSKI, L. A. (1990). Electrolyte and gas exchange during the moulting cycle of a freshwater crayfish. *J. exp. Biol.* **151**, 469–483.
- WIERSMA, C. A. G., FURSHPAN, E. AND FLOREY, E. (1953). Physiological and pharmacological observations on muscle receptor organs of the crayfish, *Cambarus clarkii* Girard. *J. exp. Biol.* **30**, 136–150.
- ZANOTTO, F. P. AND WHEATLY, M. G. (1993). The effect of ambient pH on electrolyte regulation during the postmolt period in freshwater crayfish *Procambarus clarkii*. *J. exp. Biol.* **178**, 1–19.
